# Supplementary material for: A topic modeling approach reveals the dynamic T cell composition of peripheral blood during cancer immunotherapy
Source: PubMed Central journal article supplement — Cell Rep Methods. 2023 Aug 2;3(8):100546. doi: 10.1016/j.crmeth.2023.100546 (PMC10475788; doi:10.1016/j.crmeth.2023.100546), 2023-08-02
Supplement: mmc1.pdf [file mmc1.pdf]

**Cell Reports Methods, Volume 3**

**Supplemental information**

**A topic modeling approach reveals the dynamic**

**T cell composition of peripheral blood**

**during cancer immunotherapy**

**Xiyu Peng, Jasme Lee, Matthew Adamow, Colleen Maher, Michael A. Postow, Margaret K. Callahan, Katherine S. Panageas, and Ronglai Shen**

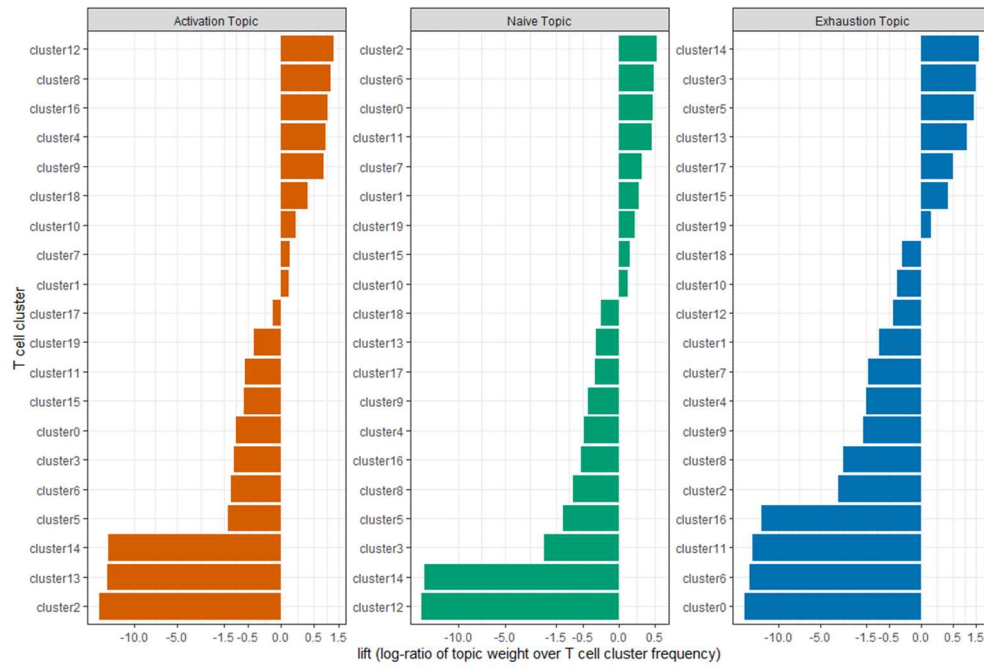

**Figure S1: Selection of representative clusters for each topic, related to Figure 3. Lift of clusters for each topic, plotted on a signed square root scale. The metric lift gives high weights to clusters that appear less frequently in other topics. Those clusters that have high lift statistics are identified as representatives of single topics.**

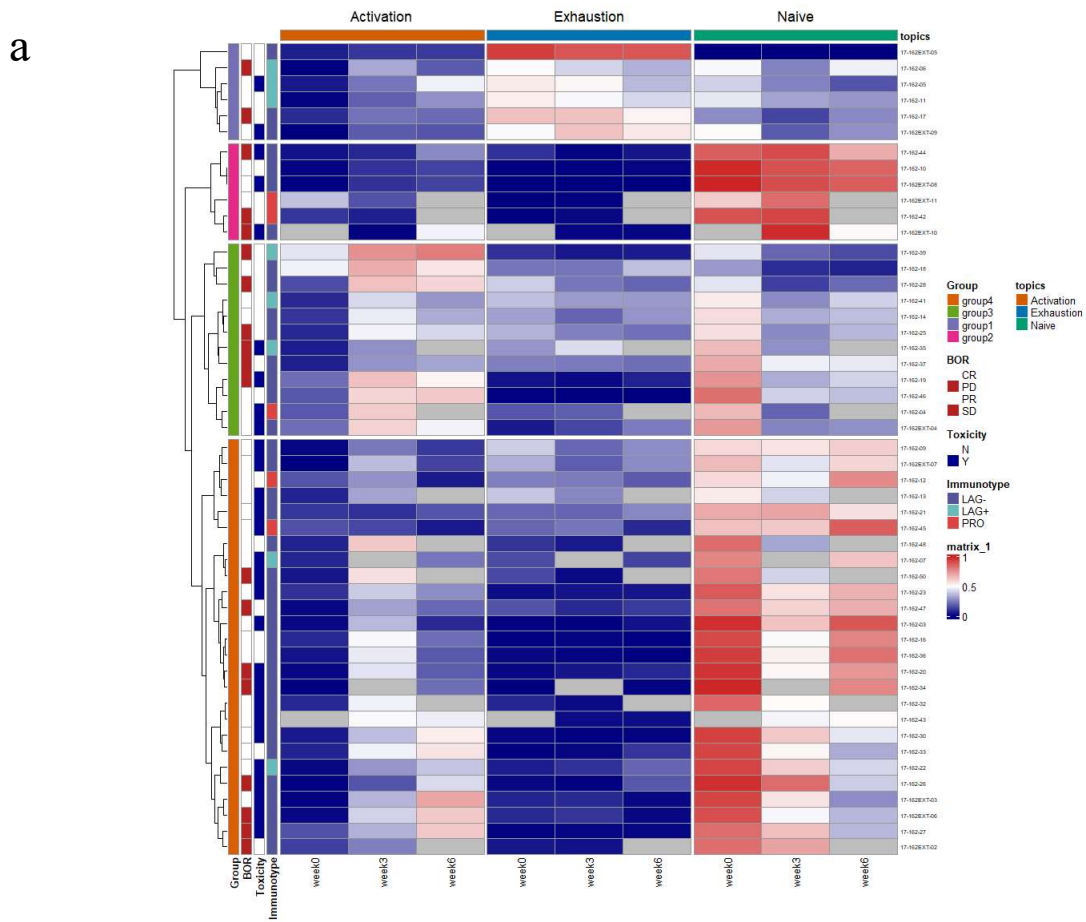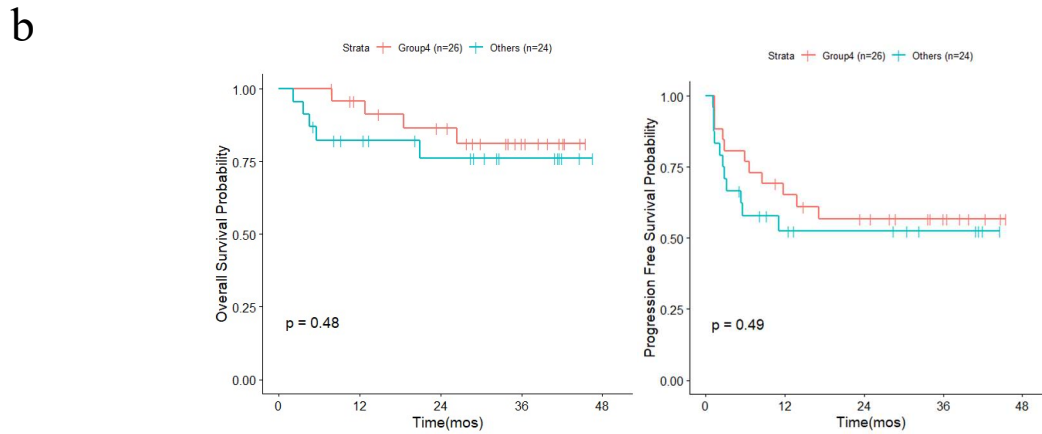

**Figure S2: Identification of patient subgroups with LDA, related to Figure 4.** a) Patient subgroups revealed by hierarchical clustering on sample topic proportions. b) Kaplan-Meier analysis of OS and PFS stratified by patient subgroup.

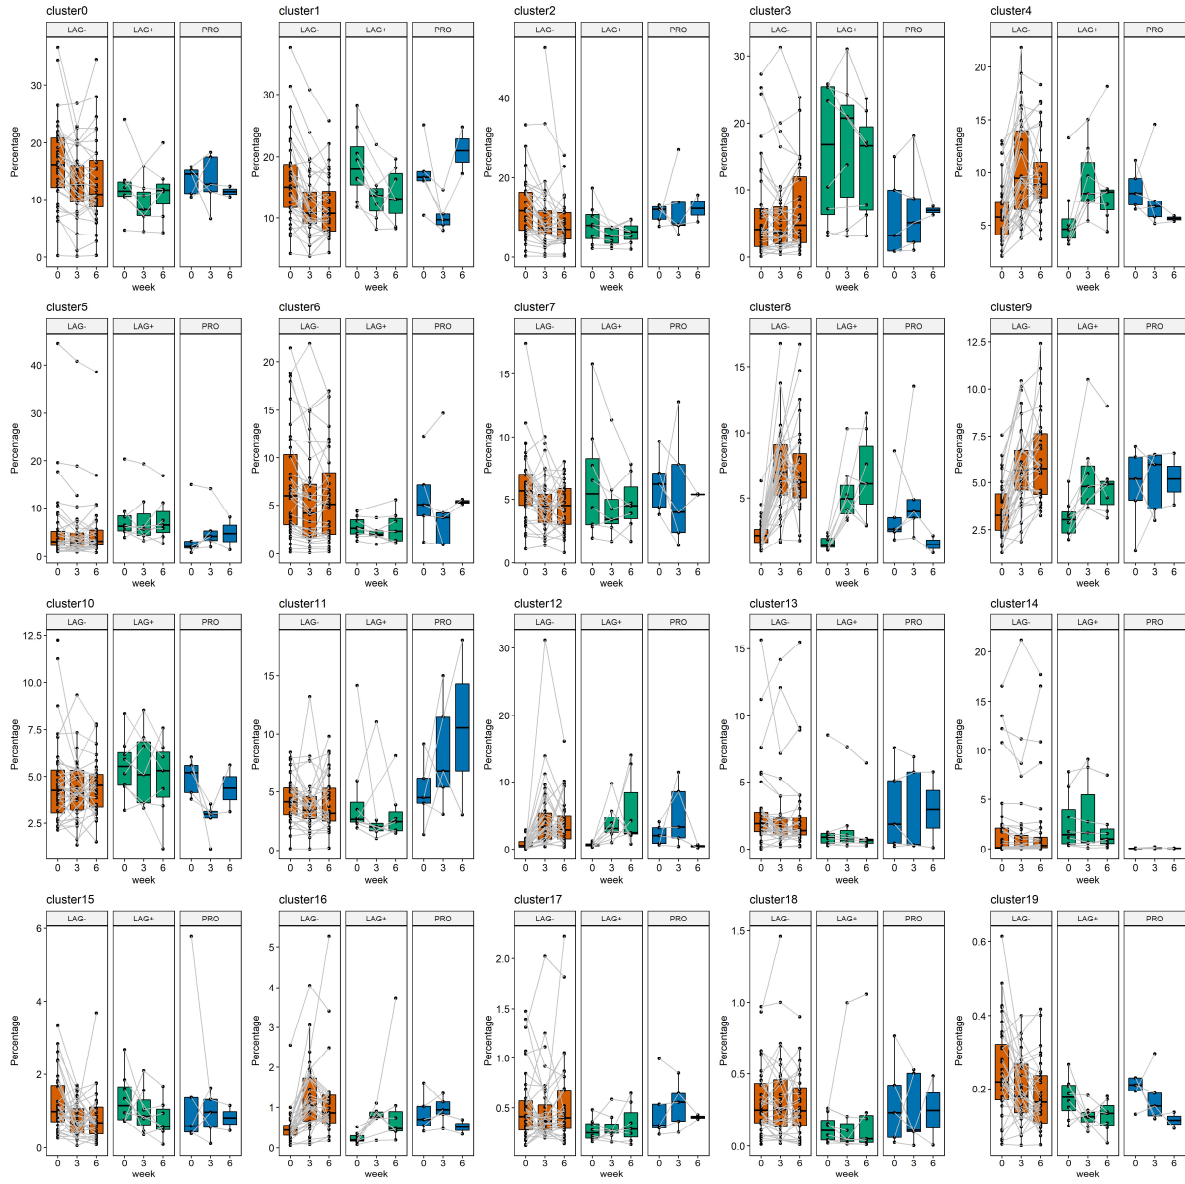

Figure S3: Pharmacodynamics of single clusters across different immunotypes, related to Figure

4.



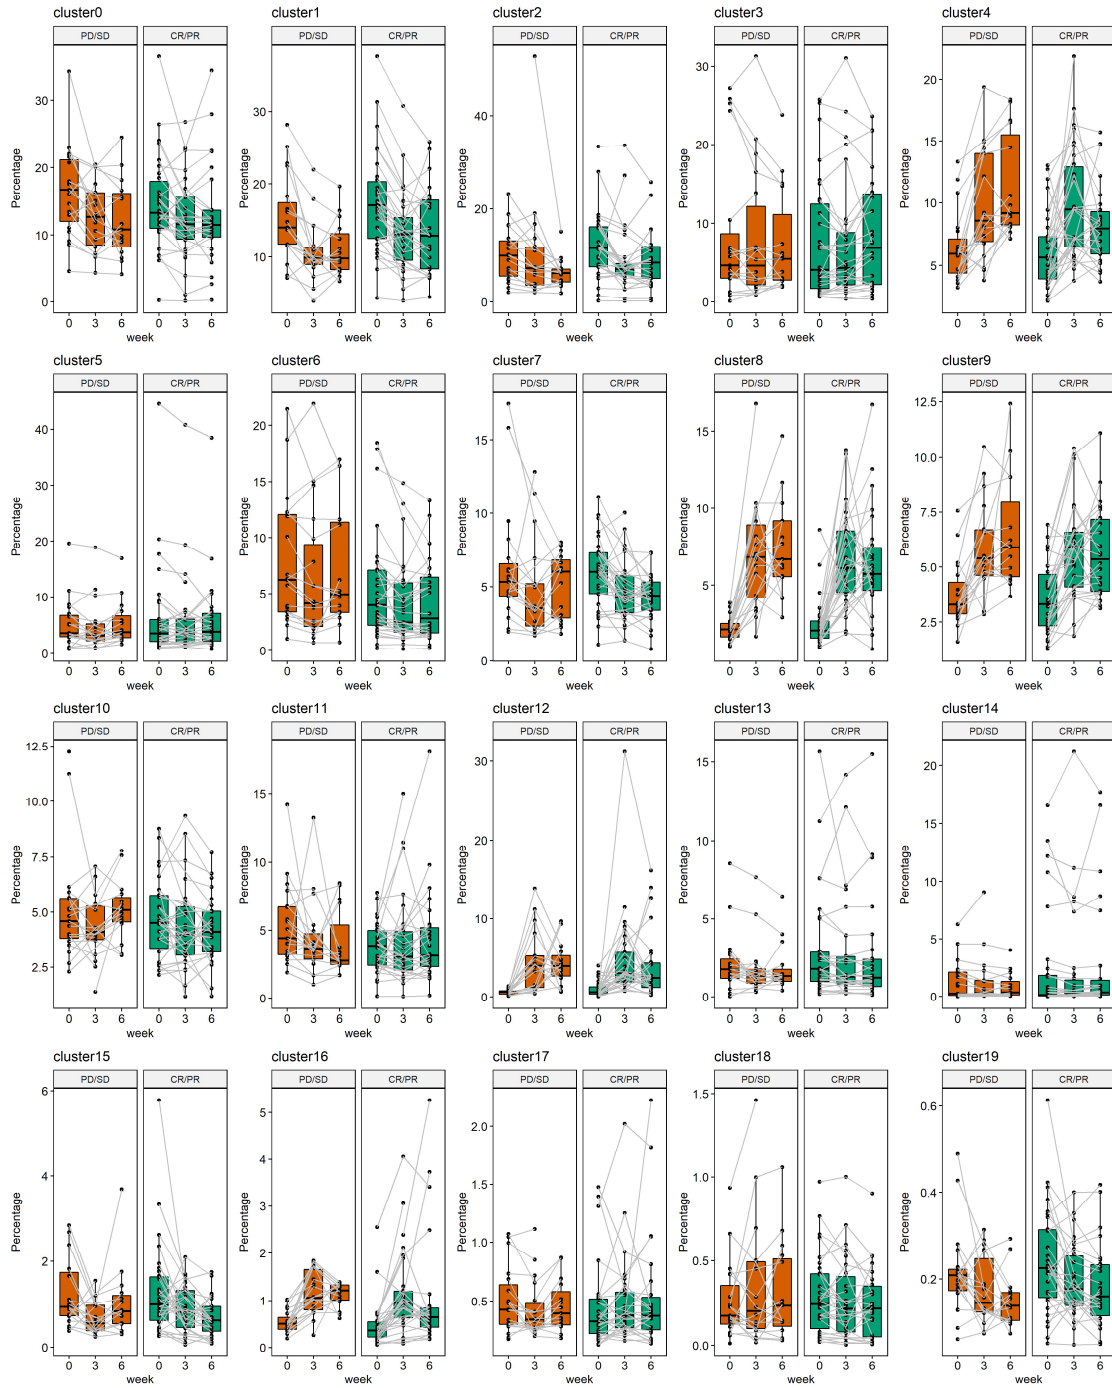

Figure S4: Pharmacodynamics of single clusters across different responses, related to Figure 4.

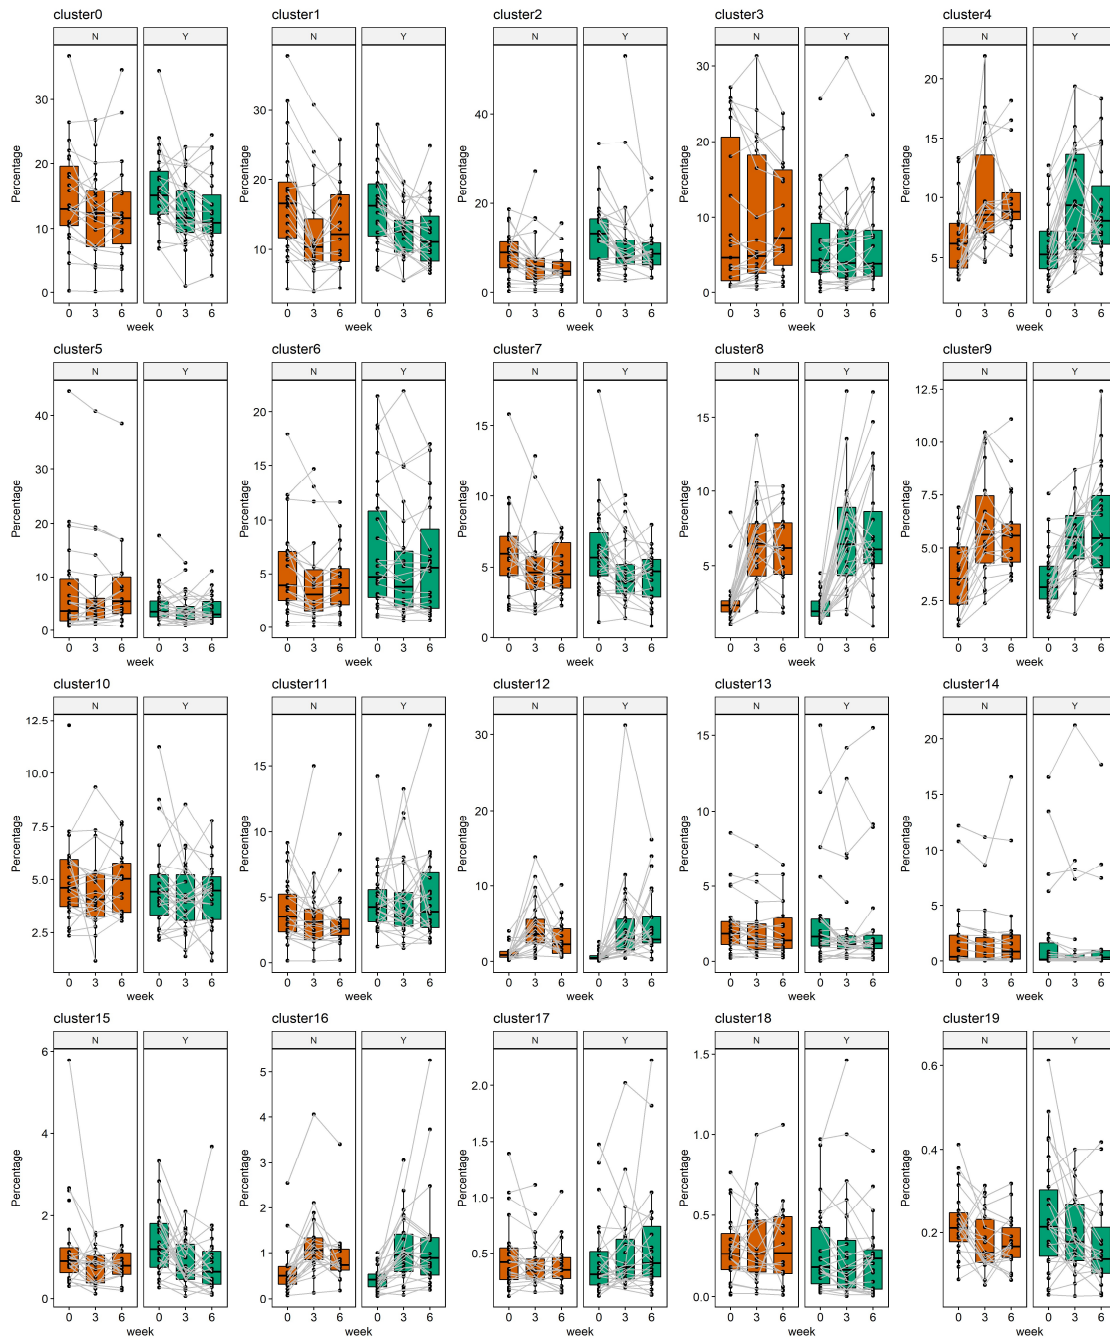

**Figure S5: Pharmacodynamics of single clusters across different levels of toxicity, related to Figure 4.**

a

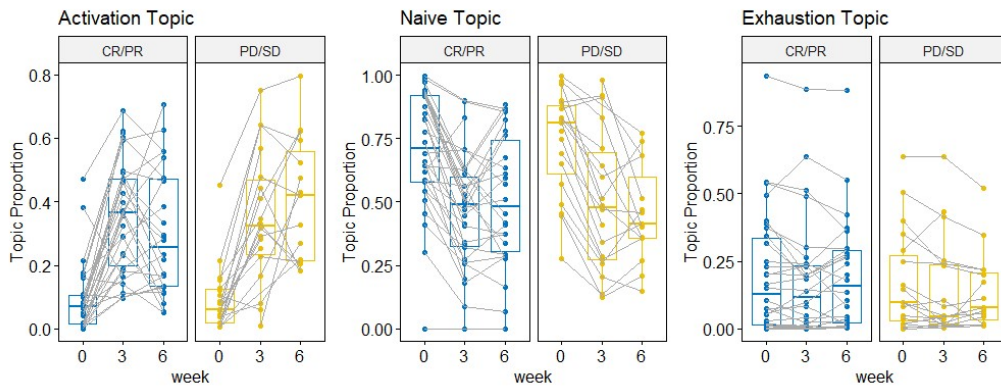

b

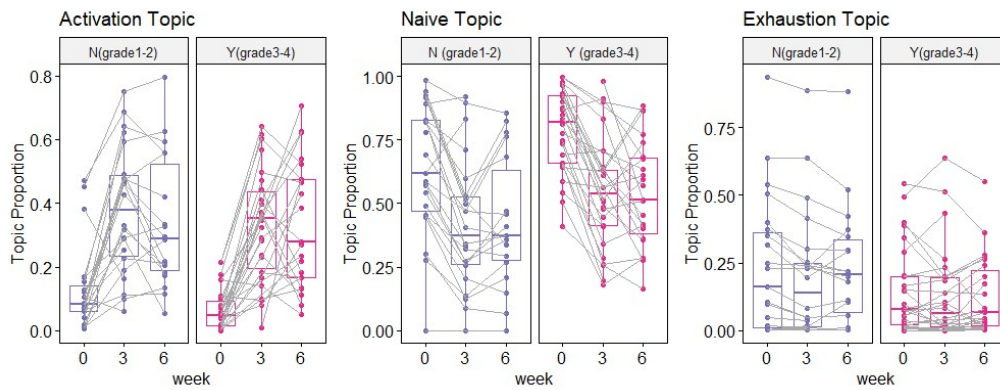

**Figure S6: Pharmacodynamics of topic proportions across different responses and levels of toxicity, related to Figure 4.**

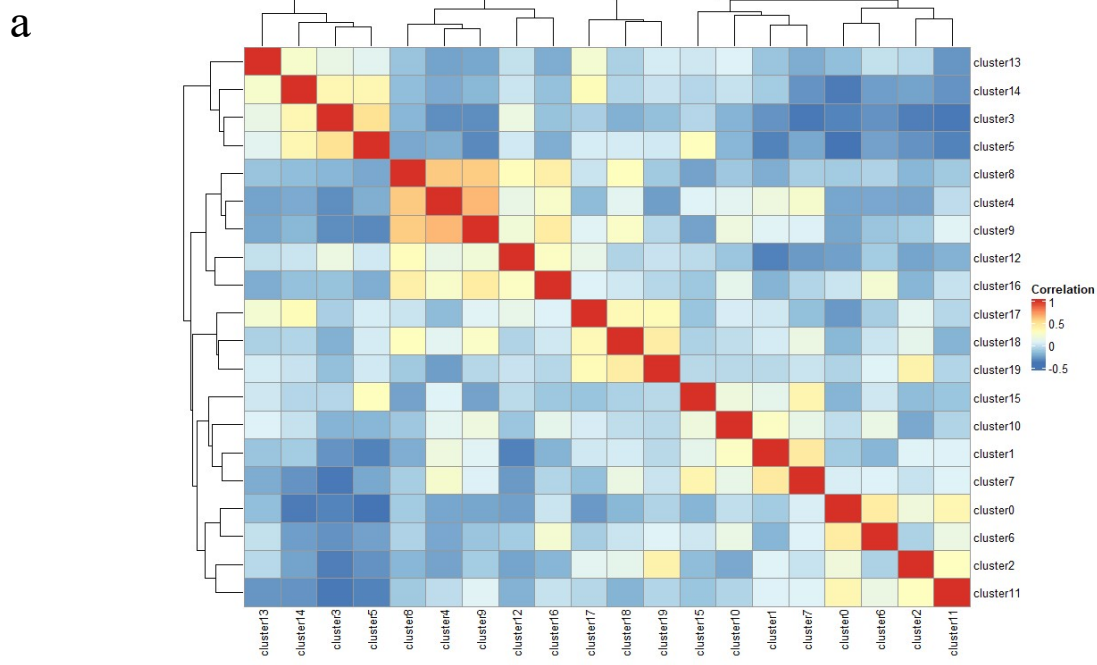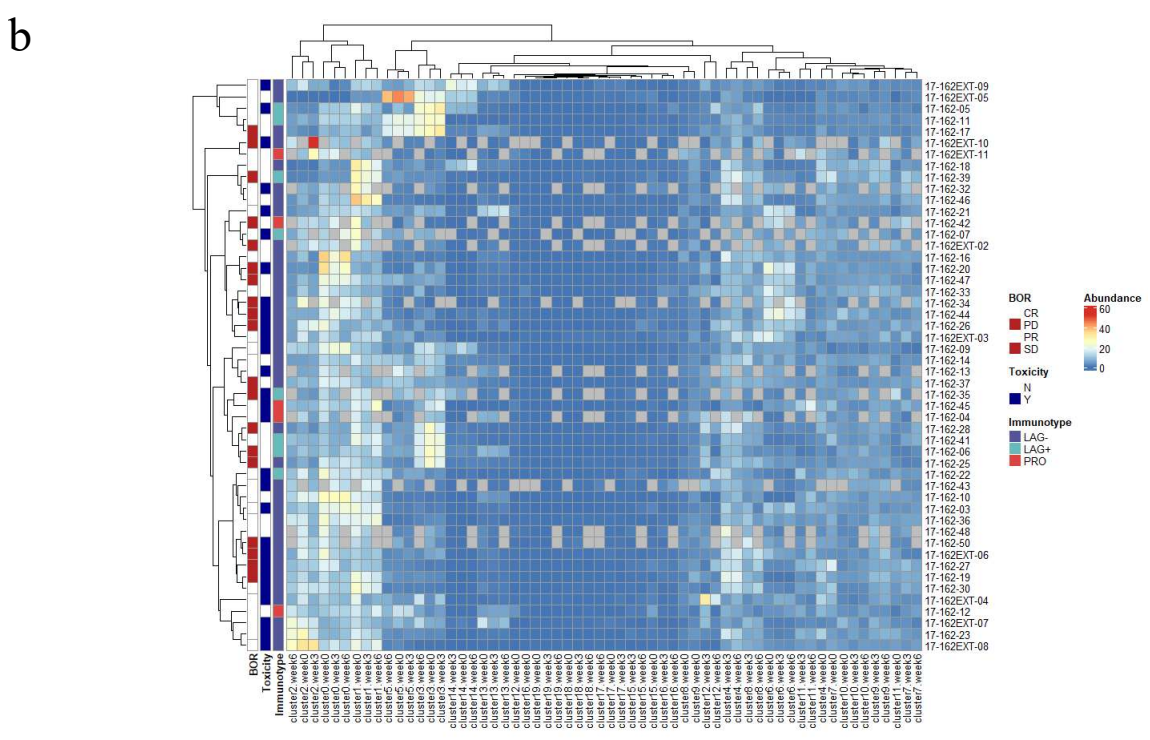

**Figure S7: Hierarchical clustering based on a) Pearson correlation of clusters and b) cluster abundances, related to Figure 4.**

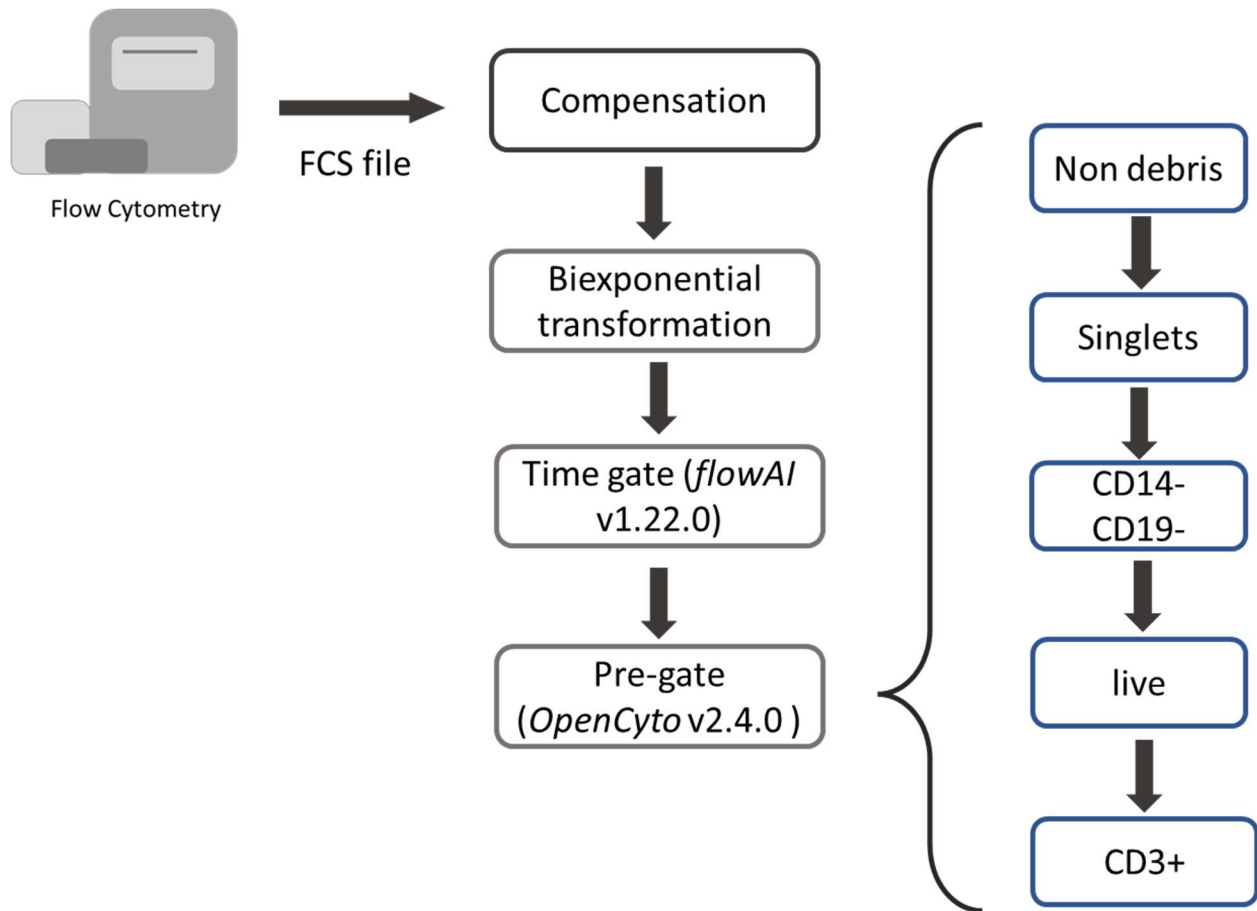

Figure S8: Pre-gating analysis on flow cytometry data, related to STAR Methods.

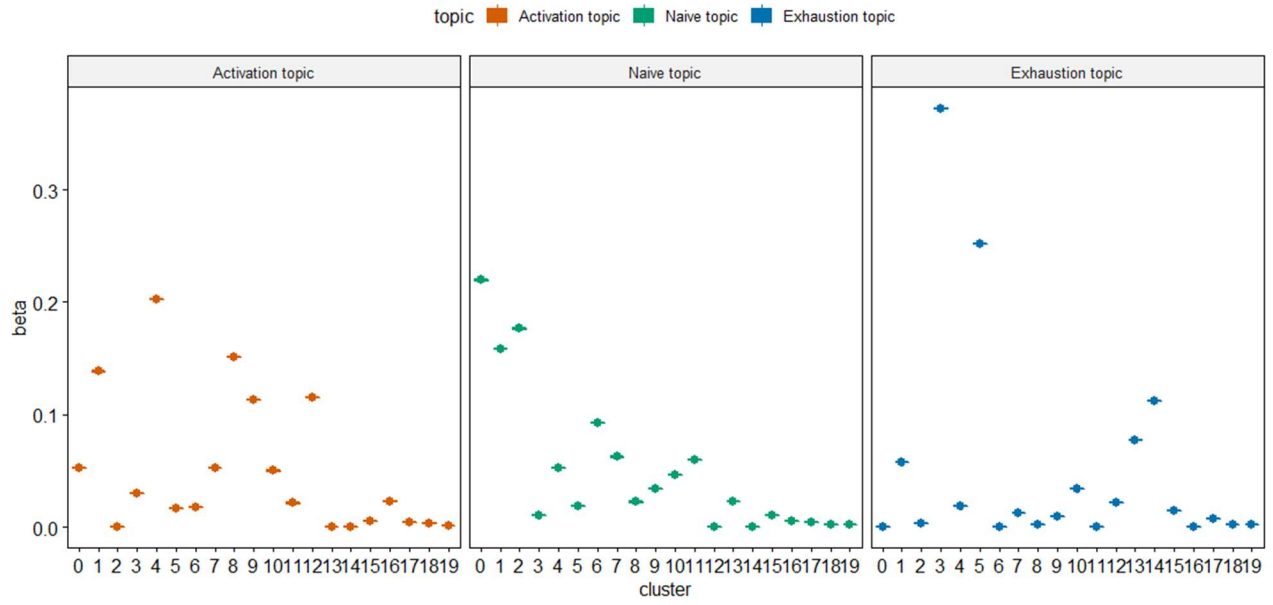

**Figure S9: Estimation of the cell-type-by-topic matrix B by Gibbs Sampling under ten random starts, related to STAR Methods.**

**Table S1. Statistical analysis of single clusters associated with patient clinical outcomes and immunotypes, related to Figure 2.**

| Cluster | Immunotype |                       | Response |                       | Toxicity |                       |
|---------|------------|-----------------------|----------|-----------------------|----------|-----------------------|
|         | Immunotype | Interaction with time | Response | Interaction with time | Toxicity | Interaction with time |
| 0       | ns         | ns                    | ns       | ns                    | ns       | ns                    |
| 1       | ns         | *                     | ns       | ns                    | ns       | ns                    |
| 2       | ns         | ns                    | ns       | ns                    | ns       | ns                    |
| 3       | ns         | ns                    | ns       | ns                    | ns       | ns                    |
| 4       | ns         | ***                   | ns       | ns                    | ns       | ns                    |
| 5       | ns         | ns                    | ns       | ns                    | ns       | ns                    |
| 6       | *          | *                     | ns       | ns                    | ns       | ns                    |
| 7       | ns         | ns                    | ns       | ns                    | ns       | ns                    |
| 8       | ns         | ***                   | ns       | ns                    | ns       | ns                    |
| 9       | ns         | ns                    | ns       | ns                    | ns       | ns                    |
| 10      | ns         | ns                    | ns       | ns                    | ns       | ns                    |
| 11      | ns         | *                     | ns       | ns                    | ns       | ns                    |
| 12      | ns         | ***                   | ns       | ns                    | ns       | ns                    |
| 13      | ns         | ns                    | ns       | ns                    | ns       | ns                    |
| 14      | *          | ns                    | ns       | ns                    | ns       | ns                    |
| 15      | ns         | ns                    | ns       | ns                    | ns       | ns                    |
| 16      | ns         | *                     | *        | ns                    | ns       | ns                    |
| 17      | ns         | ns                    | ns       | ns                    | ns       | ns                    |
| 18      | ns         | ns                    | ns       | ns                    | ns       | ns                    |
| 19      | ns         | ns                    | ns       | ns                    | ns       | ns                    |

\*\*\* P < 0.001; \*\* P < 0.01; \* P < 0.05; ns, not significant. P-values for the main effect and the interaction effect with time were given by *nparLD* R package, based on patients with all three timepoints (n=37). P-values was adjusted by Benjamini-Hochberg method with a false discovery rate controlled at 5%.

**Table S2. Cell markers in the X50 flow panel, related to STAR Methods.**

| <b>Cell Marker</b> | <b>Role</b>                                          |
|--------------------|------------------------------------------------------|
| CD3                | Lineage_T-cell                                       |
| CD4                | Lineage_T-cell                                       |
| CD8                | Lineage_T-cell                                       |
| CD14               | Lineage_Monocyte                                     |
| CD19               | Lineage_B-cell                                       |
| FoxP3              | Lineage_Treg                                         |
| CXCR5              | Chemokine-Tfh cells                                  |
| CCR4               | Chemokine-Th2, Th17, Tregs cells                     |
| CD45RA             | Differentiation_Memory                               |
| CCR7/ CD197        | Differentiation_Memory                               |
| CD27               | Differentiation_Costimulatory                        |
| CD28               | Differentiation_Costimulatory                        |
| CD127              | Differentiation                                      |
| CD25               | Differentiation                                      |
| CD57               | Differentiation                                      |
| Eomes              | Transcription Factor- T-cell expansion/proliferation |
| Tbet               | Transcription Factor                                 |
| Granzyme B         | Functional: Cytotoxic T-Lymphocytes                  |
| Ki67               | T cell proliferation marker/Activation               |
| HLA-DR             | Differentiation_Activation                           |
| CD38               | Differentiation_Activation                           |
| ICOS/ CD278        | Costimulatory marker                                 |
| GITR               | Costimulatory                                        |
| CTLA-4/ CD152      | Exhaustion                                           |
| PD-1/ CD279        | Activation/exhaustion                                |
| TIM-3              | Exhaustion                                           |
| LAG-3/ CD223       | Co-inhibitory/Exhaustion                             |
| TIGIT              | Activation/Exhaustion                                |



**Table S3. T cell Gating template used in *openCyto* R package, related to STAR Methods.**

| alias      | pop | parent     | dims        | gating_method   | gating_args | collapseDataForGating | groupBy | preprocessing_method | preprocessing_args |
|------------|-----|------------|-------------|-----------------|-------------|-----------------------|---------|----------------------|--------------------|
| nonDebris  | +   | root       | FSC-A       | gate_mindensity |             |                       |         |                      |                    |
| singlets   | +   | nonDebris  | FSC-A,FSC-H | singletGate     |             |                       |         |                      |                    |
| cd14-cd19- | -   | singlets   | CD1419      | gate_mindensity |             |                       |         |                      |                    |
| live       | -   | cd14-cd19- | L_D         | gate_mindensity |             |                       |         |                      |                    |
| cd3        | +   | live       | CD3         | gate_mindensity |             | TRUE                  | 4       |                      |                    |

In the pre-gating procedure, nonDebris, singlets, CD1419-, live, CD3+ cells were gated in the order described in the gating template, which was used as the input of *openCyto* R package (blank cells are the default to be used as the input). See details in the documentation of *openCyto* R package.
